# Supplementary material for: Reprogramming of Melanoma Tumor-Infiltrating Lymphocytes to Induced Pluripotent Stem Cells
Source: PubMed Central journal article supplement (PMC4707343; doi:10.1155/2016/8394960), 2015-12-28
Supplement: 8394960.f1.pdf [file 8394960.f1.pdf]

Supplemental Figure 1

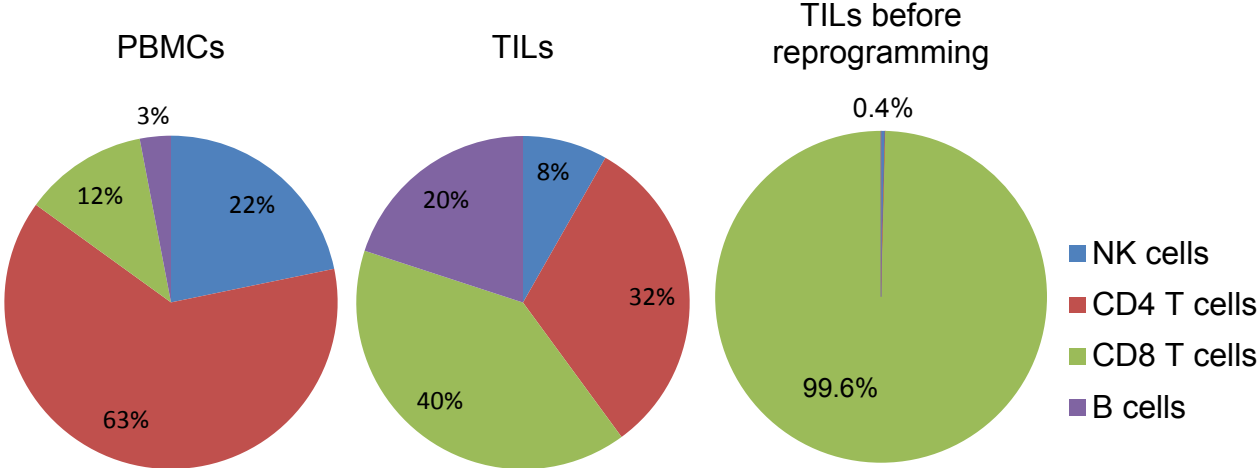

Supplemental Figure 2

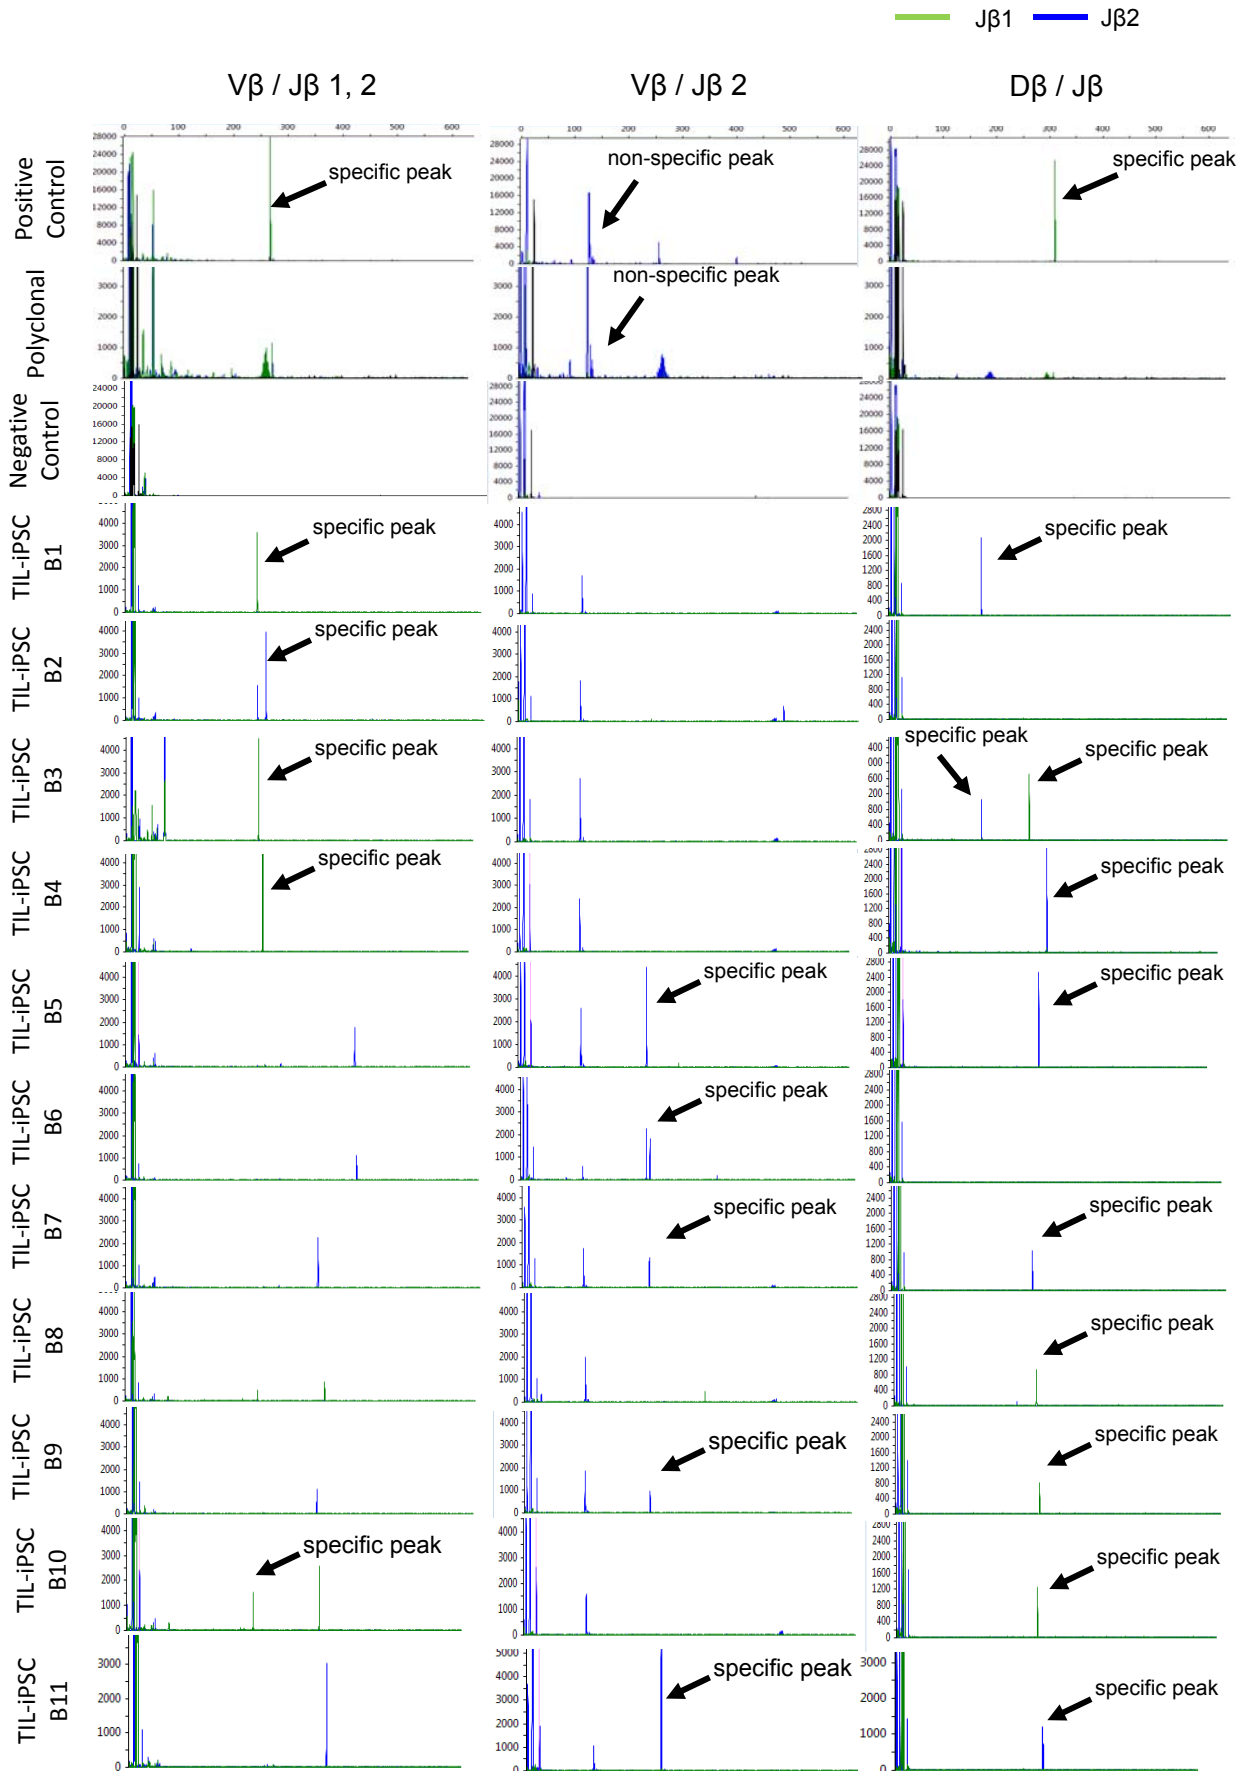

Jβ1 Jβ2

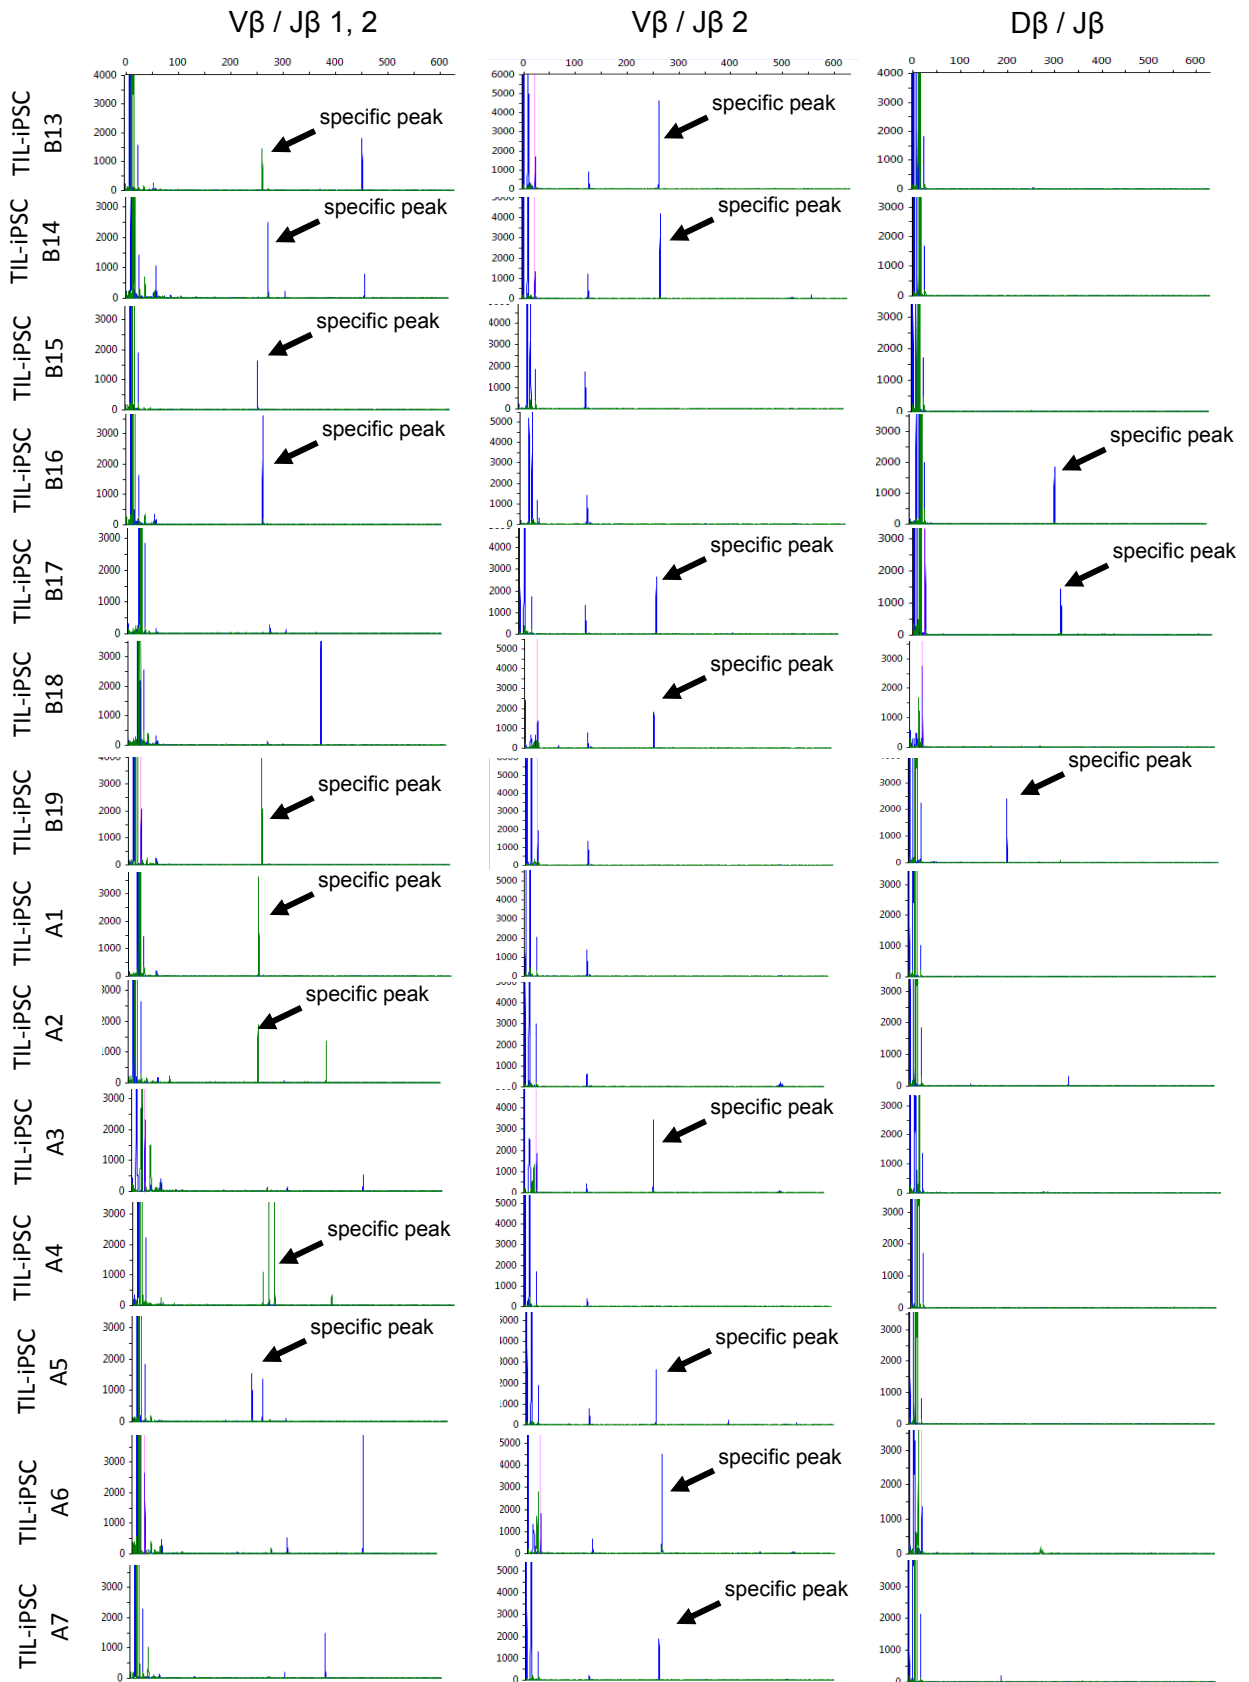

**Table S1**

The sequences of primer sets

| Genes  | Sequences<br>(Forward: F, Reverse: R) |
|--------|---------------------------------------|
| OCT3/4 | F: AGTCAGTGAACAGGGAATGG               |
|        | R: TCGGGATTCAAGAACCTACG               |
| SOX2   | F: GAGAGAAAGAAAGGGAGAGAAG             |
|        | R: GAGAGAGGCAAACCTGGAATC              |
| KLF4   | F: GATGAACTGACCAGGCACTA               |
|        | R: GTGGGTCATATCCACTGTCT               |
| cMYC   | F: TGCCTCAAATTGGACTTTGG               |
|        | R: GATTGAAATTCTGTGTAAGTGC             |
| NANOG  | F: TCCTCCTCTTCCTCTATACTAAC            |
|        | R: CCCACAAATCACAGGCATAG               |
| GAPDH  | F: TGAAGGTCGGAGTCAACGGATTTGGT         |
|        | R: CATGTGGGCCATGAGGTCCACCAC           |
